# Supplementary material
Source: HighWire-hosted journal article supplement (https://bmjopen.bmj.com/content/7/9/e015854)
Supplement: inline-supplementary-material-1 [file inline-supplementary-material-1.pdf]

## Supplementary material: Case questions

Correct answers, calculated by the app *Labtracker+*, are shown in bold.

Reference values are from Maastricht University Medical Center (MUMC+).

### 1. Glucose

**Reference values fasting glucose [4.0 – 7.0 mmol/L]**

First measurement: **[7.3 mmol/L]**

Second measurement (**two weeks later**) : **[6.9 mmol/L]**

What is the probability likelihood that this is a real change?

- A: Unlikely (<50%)**
- B: Doubtful (50-80%)
- C: Likely (80-95%)
- D: Very likely(>95%)

### 2. TSH

**Reference values TSH [0.4-4.3 mU/L]**

First measurement: **[6.5 mU/L]**

Second measurement (**three months later**) : **[7.1 mU/L]**

What is the probability likelihood that this is a real change?

- A: Unlikely (<50%)**
- B: Doubtful (50-80%)
- C: Likely (80-95%)
- D: Very likely (>95%)

### 3. CRP

**Reference values CRP: <10 mg/L**

First measurement: [79 mg/L]  
Second measurement (two days later): [106 mg/L]

What is the probability likelihood that this is a real change?

- A: Unlikely (<50%)
- B: Doubtful (50-80%)
- C: Likely (80-95%)
- D: Very likely (>95%)**

### 4. Haemoglobin

**Reference values haemoglobin for a woman (7.5-9.5 mmol/L)**

First measurement: [7.0 mmol/L]  
Second measurement (six months later): [7.2 mmol/L]

What is the probability likelihood that this is a real change?

- A: Unlikely (<50%)**
- B: Doubtful (50-80%)
- C: Likely (80-95%)
- D: Very likely (>95%)

### 5. HbA1c

**Target value HbA1c <58 mmol/mol**

First measurement: [55 mmol/mol] (= 7.2%)  
Second measurement (6 months later): [60 mmol/mol] (= 7.6%)

What is the probability likelihood that this is a real change?

- A: Unlikely (<50%)
- B: Doubtful (50-80%)
- C: Likely (80-95%)**
- D: Very likely (>95%)

## 6. Leukocytes

*Reference values leukocytes [3.5-11.0\*10<sup>9</sup>/L]*

First measurement: [12\*10<sup>9</sup>/L]

Second measurement (14 days later): [14\*10<sup>9</sup>/L]

What is the probability likelihood that this is a real change?

A: Unlikely (<50%)

**B: Doubtful (50-80%)**

C: Likely (80-95%)

D: Very likely (>95%)

## 7. aPTT (this question was excluded from analyses)

*Reference values aPTT [18-36 sec]*

First measurement: [30 sec]

Second measurement (a few hours later) : [34 sec]

What is the probability likelihood that this is a real change?

A: Unlikely (<50%)

B: Doubtful (50-80%)

C: Likely (80-95%)

**D: Very likely (>95%)**

## 8. Vitamin B12

*Reference values vitamin B12 [250-850 pmol/L]*

First measurement: [114 pmol/L]

Second measurement (3 months later): [125 pmol/L]

What is the probability likelihood that this is a real change?

**A: Unlikely (<50%)**

B: Doubtful (50-80%)

C: Likely (80-95%)

D: Very likely (>95%)

## 9. ALAT

*Reference values ALAT < 45U/L*

First measurement: [44 U/L]

Second measurement (6 months later): [55 U/L]

What is the probability likelihood that this is a real change?

A: Unlikely (<50%)

**B: Doubtful (50-80%)**

C: Likely (80-95%)

D: Very likely (>95%)

## 10. Creatinine

*Reference values creatinine for men [60-110 µmol/L]*

First measurement: [89 µmol/L]

Second measurement (one year later): [109 µmol/L]

What is the probability likelihood that this is a real change?

A: Unlikely (<50%)

B: Doubtful (50-80%)

C: Likely (80-95%)

**D: Very likely (>95%)**
